# Supplementary material for: The Application Effect of the 5E Instructional Model in the 'Basic Nursing' Course in Characteristic Industry College
Source: Research Square preprint supplement (doi:10.21203/rs.3.rs-4865206/v1), 2026-01-21
Supplement: Supplementary file 1 [file 718b9e7fcc3f44dcec0039b6.docx]

# STROBE Statement—Checklist for Cohort Studies (Filled from “Perfect Version” Manuscript)

Manuscript: Application of the “5E” Instructional Model to Basic Nursing Teaching in Characteristic Industry College (Retrospective Cohort)

Note: Page (p.) and line (L.) numbers refer to the line-numbered revised PDF provided by the author. “NA” = not applicable / not reported.

| Item No. | Recommendation | Where in manuscript (section / p., L.) |
| --- | --- | --- |
| 1(a) | Indicate the study design in the title or abstract. | Abstract Methods: “A retrospective cohort study design was used.” (p.2, L.11–17). |
| 1(b) | Provide an informative, balanced summary of what was done and found in the abstract. | Abstract (Objective, Methods, Results, Conclusion) (p.2, L.3–29). |
| 2 | Explain scientific background and rationale. | Background (p.3–7, L.30–113). |
| 3 | State specific objectives, including any prespecified hypotheses. | End of Background: three aims listed (p.6–7, L.102–113). |
| 4 | Present key elements of study design early in the paper. | Study Design (§2.1) (p.7–8, L.115–134). |
| 5 | Describe the setting, locations, and relevant dates (recruitment, exposure, follow-up, data collection). | Institution/course context and ethics (p.7–8, L.116–123); data periods (p.8, L.135–137); course duration/setting (p.12, L.189–197). |
| 6(a) | Eligibility criteria; sources and methods of selection; methods of follow-up. | Sampling and eligibility (p.8, L.123–132); group sizes (p.8, L.126–127); CTDI measured pre/post (p.10, L.188). |
| 6(b) | For matched studies, give matching criteria and numbers of matched pairs. | NA (not a matched study). |
| 7 | Clearly define all outcomes, exposures, predictors, potential confounders, and effect modifiers. | Exposure: 5E vs traditional (§2.3.1–2.3.2) (p.11–13, L.198–260). Outcomes: course scores & CTDI‑CV (§2.2.2–2.2.3) (p.9–10, L.147–188). Predictors/confounders collected: sex, age, GPA (§2.2.1) (p.8–9, L.138–145). |
| 8 | For each variable, give data sources and assessment methods; describe comparability if >1 group. | Academic affairs system; standardized rubrics and combined online/offline scoring (p.9, L.156–167); CTDI‑CV instrument details/reliability (p.10, L.172–188). |
| 9 | Describe efforts to address potential sources of bias. | Quality Control (§2.4): separation of teaching and assessment; completeness checks; historical control to avoid cross‑contamination (p.13, L.266–274). |
| 10 | Explain how the study size was arrived at. | Convenience cluster sampling; size determined by eligible cohorts; no a priori calculation (p.8, L.123–127). |
| 11 | Explain handling of quantitative variables (and any groupings). | Means±SD; independent‑samples t‑tests; chi‑square for categorical; α=0.05 (p.13, L.261–265). CTDI category boundaries described (p.10, L.182–186). |
| 12(a) | Describe all statistical methods, including those used to control for confounding. | t‑tests and chi‑square; no covariate adjustment performed (p.13, L.261–265). |
| 12(b) | Describe any methods used to examine subgroups and interactions. | NA (no subgroup/interaction analyses reported). |
| 12(c) | Explain how missing data were addressed. | Completeness verified and missing items supplemented immediately (p.13, L.268–270). |
| 12(d) | If applicable, explain how loss to follow-up was addressed. | NA (course‑based assessment; all included students analyzed; ethics note on withdrawal in Declarations p.20, L.478–481). |
| 12(e) | Describe any sensitivity analyses. | NA (none reported). |
| 13(a) | Report numbers of individuals at each stage (potentially eligible, examined, included, analyzed). | Cohorts and n per group (p.8, L.123–127); sample described in Results (p.14, L.276–288); flowchart Figure 3 (p.8, L.133–134). |
| 13(b) | Give reasons for non-participation at each stage. | Not specifically enumerated; exclusion criteria defined (p.8, L.128–132). |
| 13(c) | Consider use of a flow diagram. | Figure 3 Research Design Flowchart (p.8, L.133–134). |
| 14(a) | Give characteristics of study participants (demographic, clinical, social) and information on exposures/confounders. | Baseline sex/age and GPA collection described (p.8–9, L.138–145); baseline results & Table 2 (p.14, L.276–288; p.27–28, L.581–582). |
| 14(b) | Indicate number of participants with missing data for each variable of interest. | Not explicitly reported; completeness checks described (p.13, L.268–270). |
| 14(c) | Summarise follow-up time (eg, average and total). | Course duration 144 hours across one academic year; 72 hours/semester (p.12, L.190–193). |
| 15 | Report numbers of outcome events or summary measures over time. | Course assessment outcomes Table 3 (p.28–29, L.583–584); CTDI‑CV outcomes Table 4 (p.29, L.585–586); Results text (p.14–16, L.291–347). |
| 16(a) | Give unadjusted estimates (and if applicable, adjusted) with precision (eg, 95% CI); specify confounders. | Unadjusted group means with t‑tests and p‑values reported (p.14–16, L.291–347). No adjusted analyses performed. |
| 16(b) | Report category boundaries when continuous variables were categorized. | CTDI‑CV category boundaries described (p.10, L.182–186). |
| 16(c) | If relevant, translate estimates of relative risk into absolute risk for a meaningful time period. | NA (educational outcomes; not risk-based). |
| 17 | Report other analyses (subgroups, interactions, sensitivity). | NA (none reported). |
| 18 | Summarise key results with reference to study objectives. | Discussion opening (p.16–17, L.348–357). |
| 19 | Discuss limitations, considering potential bias/imprecision; discuss direction and magnitude. | Limitations paragraph (p.18, L.405–414). |
| 20 | Give a cautious overall interpretation considering objectives, limitations, multiplicity, similar studies, and evidence. | Interpretation and mechanism paragraphs (p.17–18, L.368–404) with recommendations (p.18–19, L.415–426). |
| 21 | Discuss the generalisability (external validity) of the study results. | Promotion/extension to other courses and settings (p.18–19, L.410–426; Conclusion p.19, L.433–444). |
| 22 | Give the source of funding and the role of the funders. | Funding sources listed (p.20, L.463–467). No funder role in design/analysis stated. |

Prepared for submission with the revised (“perfect version”) manuscript.
